# Supplementary material for: From ladder, net to framework: Coordination polymers based on Zn(ii)/Cd(ii) ions and mixed bicarboxyl- and bipyridine-containing linear ligands
Source: Royal Society of Chemistry journal article supplement (doi:10.1039/c0ce00878h), 2011-01-01
Supplement: c0ce00878h.pdf [file c0ce00878h.pdf]

## Supporting Information

# From ladder, net to framework: coordination polymers based on Zn(II)/Cd(II) ions and mixed bicarboxyl- and bipyridine-containing linear ligands

Xin Wang,<sup>a</sup> Wei Yao,<sup>a</sup> Yan-Fei Qi,<sup>b</sup> Ming-Fa Luo,<sup>a</sup> Yong-Hui Wang,<sup>\*a</sup> Hong-Wei Xie,<sup>a</sup> Yang Yu,<sup>a</sup> Rui-Ying Ma<sup>a</sup> and Yang-Guang Li<sup>\*a</sup>

### 1. Additional Structural Figures

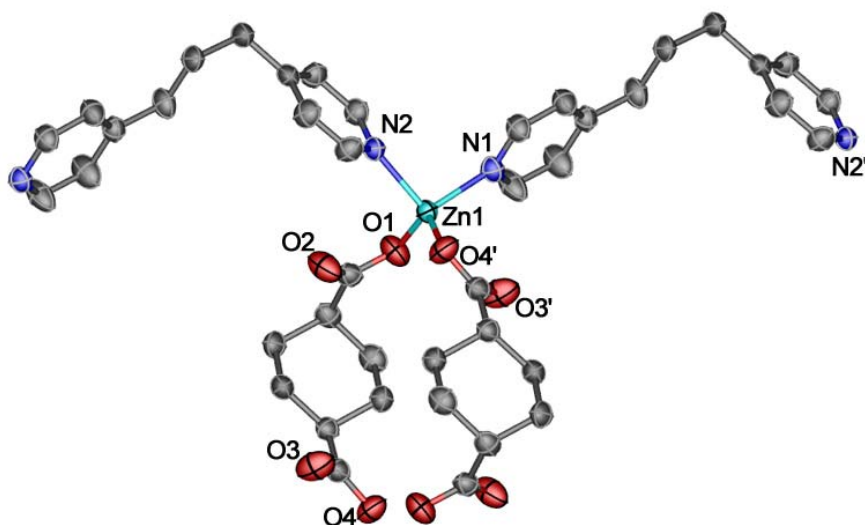

**Fig. S1.** ORTEP view of the basic unit in compound **1** with thermal ellipsoids of 50%. H atoms are omitted for clarity. The symmetry transformations for O3', O4', and N2' are  $-x+1, -y+1, -z+1$ .

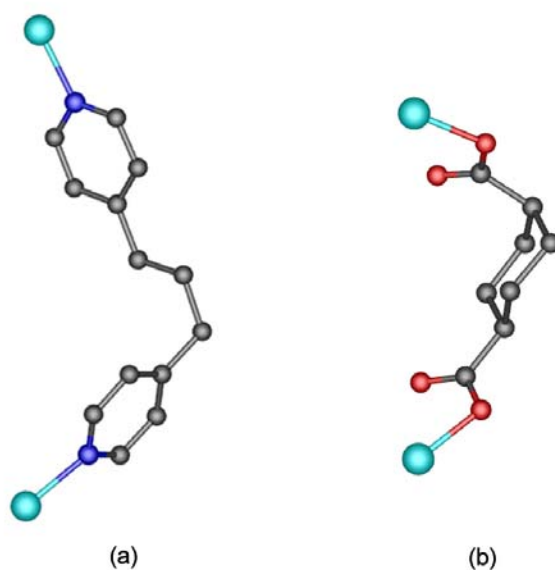

**Fig. S2.** The coordination modes of organic linear ligands in compound **1**: (a) bpp; (b) chdc.

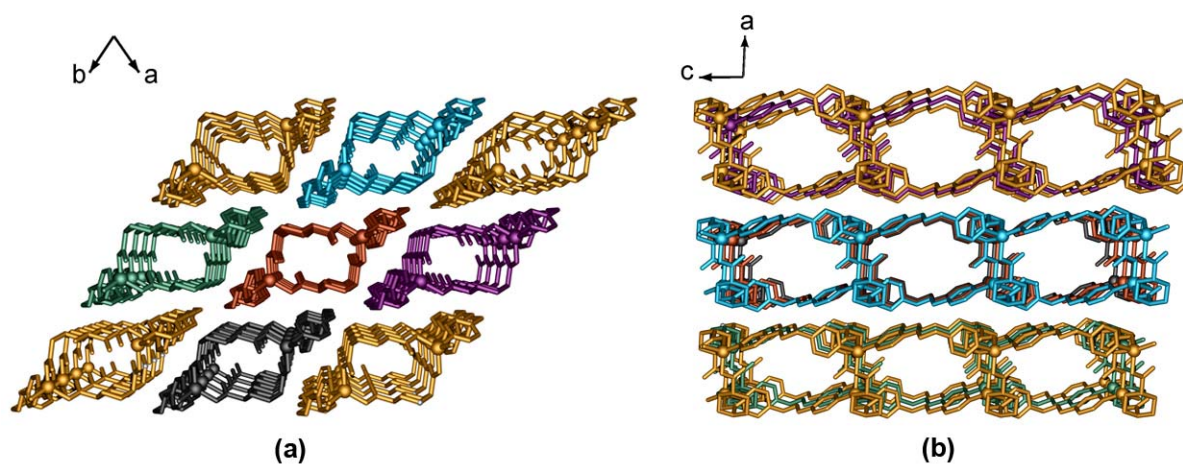

**Fig. S3** Packing arrangements of compound 1 viewed along (a) *c* axis and (b) *b* axis. The solvent water molecules are omitted for clarity.

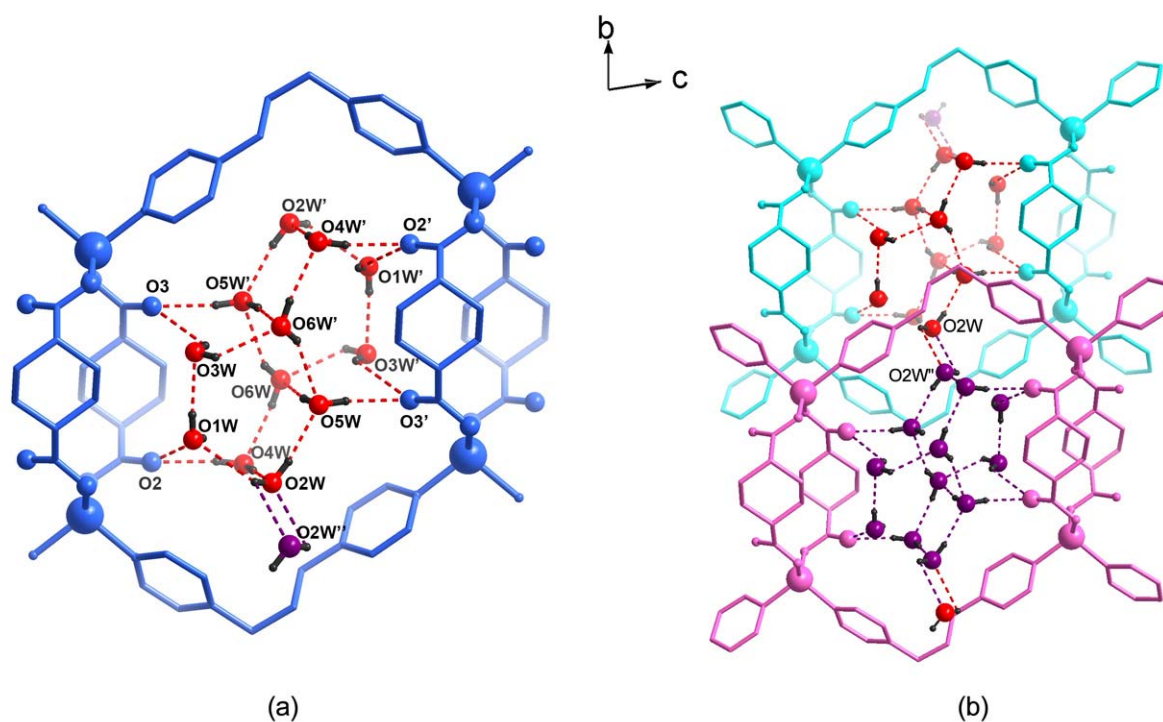

**Fig. S4** (a) The hydrogen bonding interactions among  $\{H_2O\}_{12}$  clusters and the mesh unit of the 1-D chain in 1; (b) View of the hydrogen bonding interactions between two adjacent  $\{H_2O\}_{12}$  clusters.

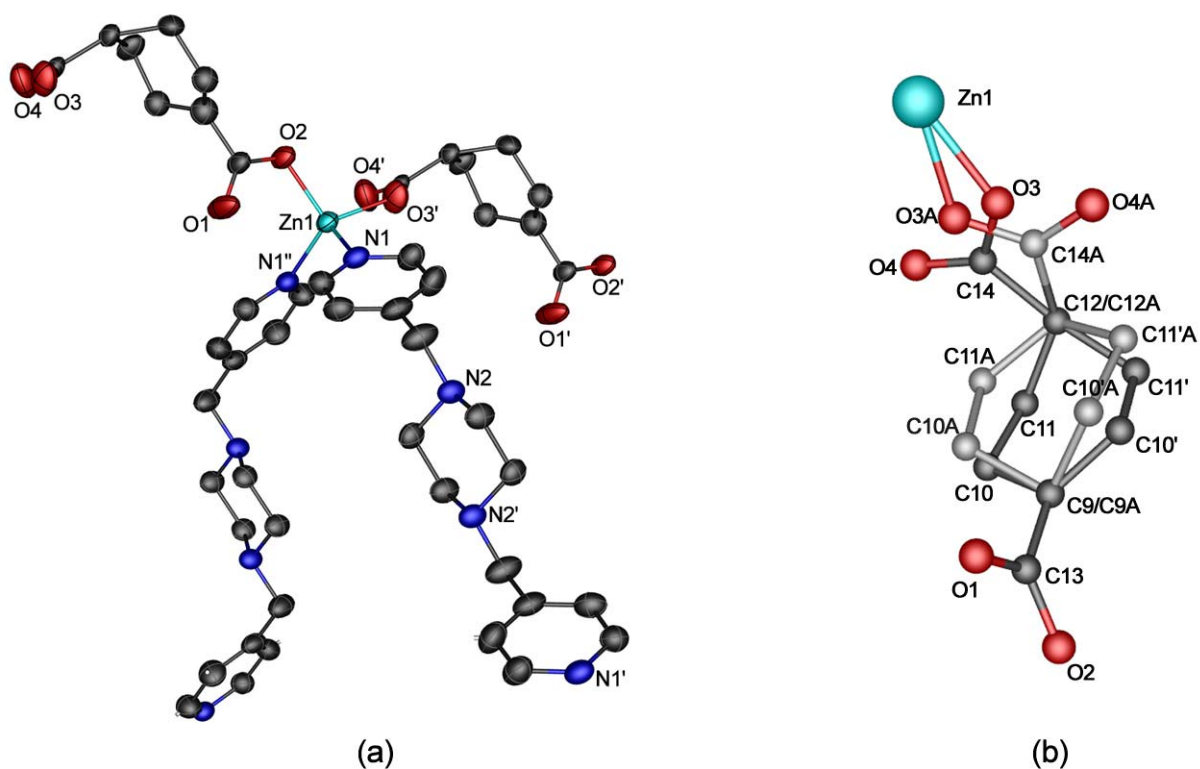

**Fig. S5.** (a) ORTEP view of the basic unit in compound **2** with thermal ellipsoids of 50%. H atoms are omitted for clarity. The symmetry transformations for O1', O2', O3' and O4' are  $x, y, z-1$ , for N1'' is  $x, -y+1/2, z$ . (b) The disordered chdc ligand in compound **2**, possessing two possible positions with the occupancies of 50% for each part.

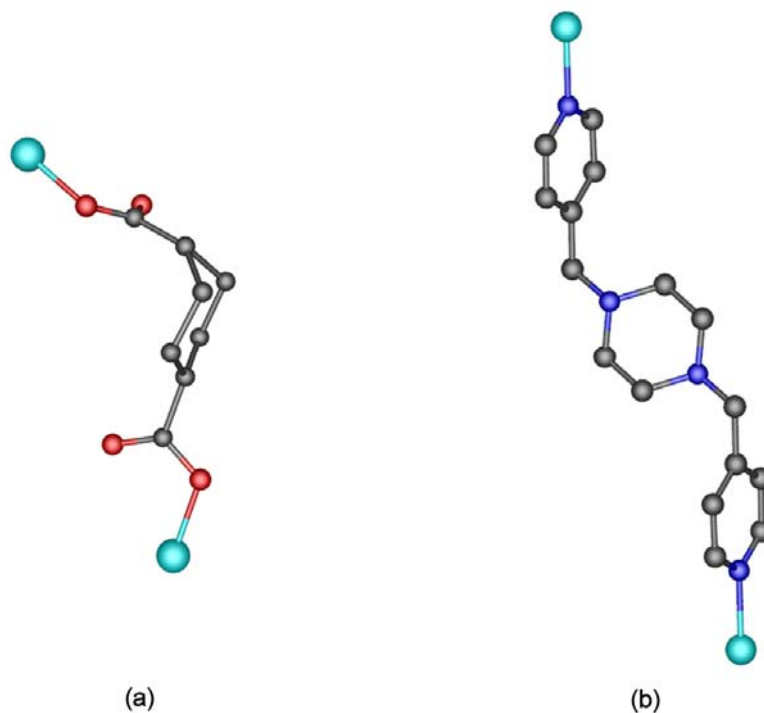

**Fig. S6.** The coordination modes of organic linear ligands in compound **2**: (a) chdc; (b) bpmp.

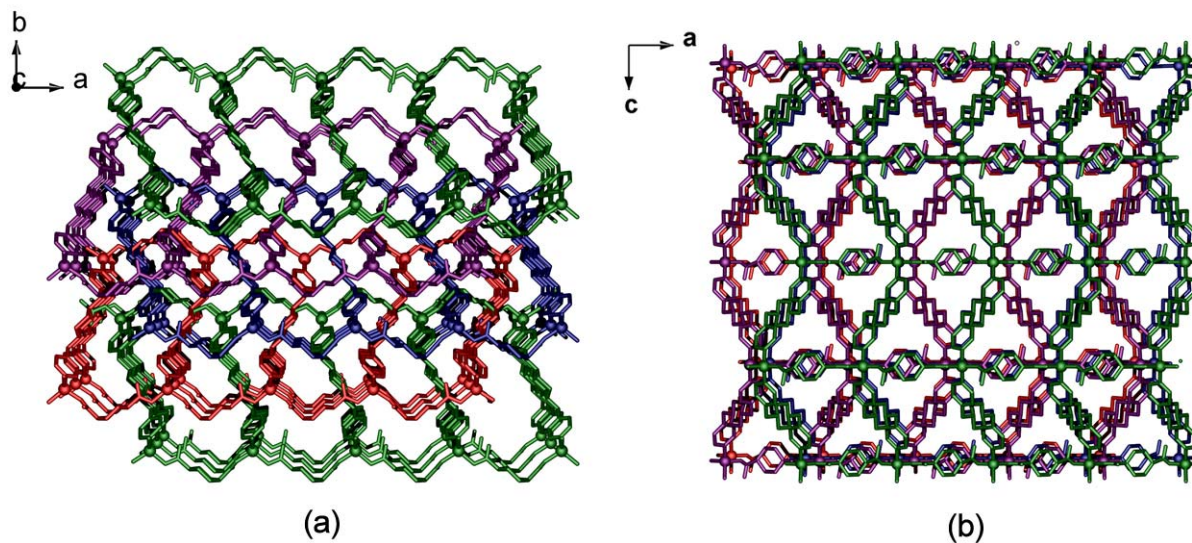

**Fig. S7.** Packing arrangements of compound **2** viewed along (a) *c* axis and (b) *b* axis.

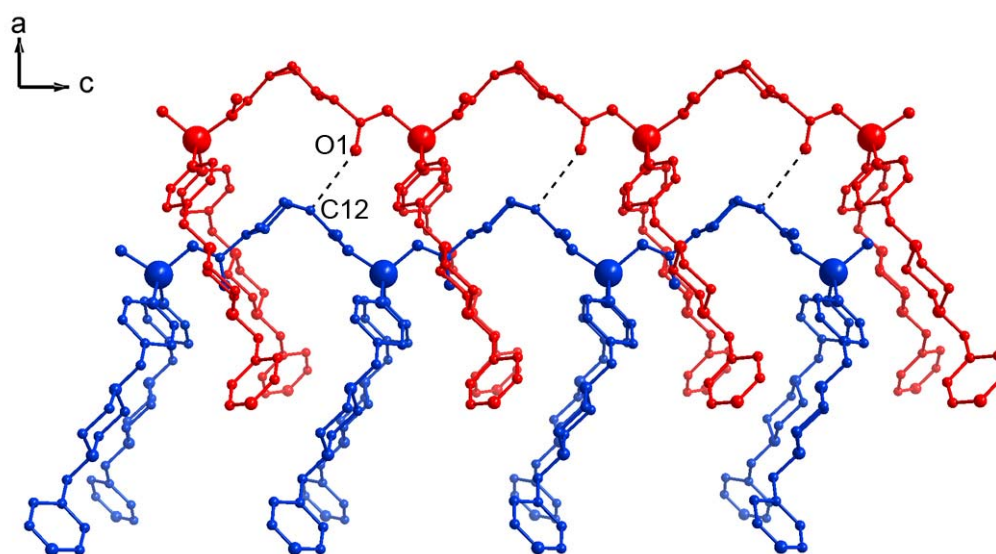

**Fig. S8** The weak intermolecular forces between two adjacent layers in **2** with the close distance of O(1)...C(12) 3.26 Å.

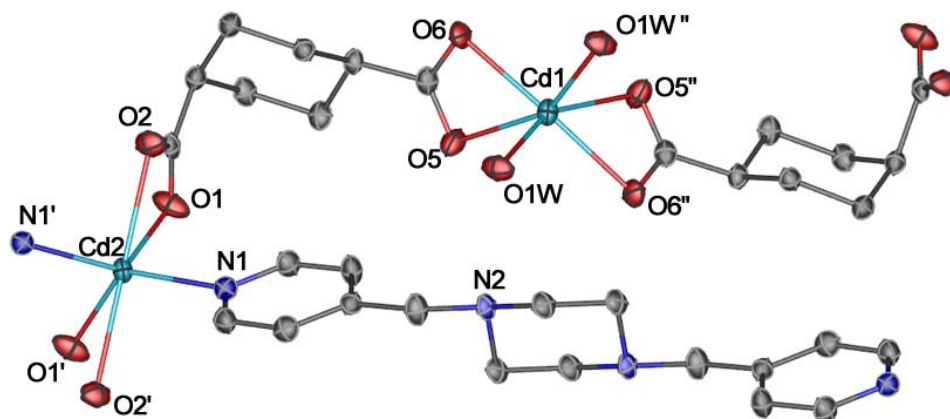

**Fig. S9.** ORTEP view of the basic unit in compound **3** with thermal ellipsoids of 50%. H atoms are omitted for clarity. The symmetry transformations for N1', O1' and O2' are  $-x+1, y, -z+1/2$ , for O5'', O6'' and O1W'' are  $-x+2, y, -z+1/2$ .

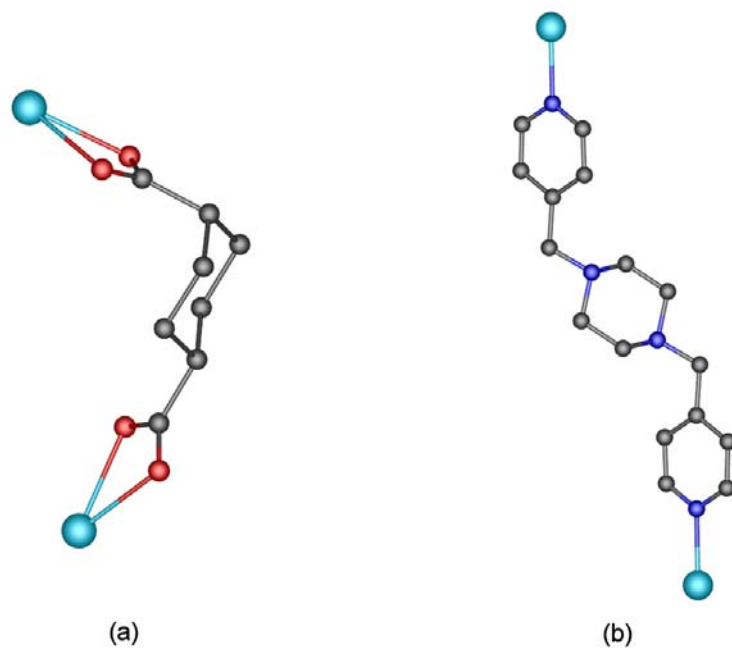

**Fig. S10.** The coordination modes of organic linear ligands in compound **3**: (a) chdc; (b) bpmp.

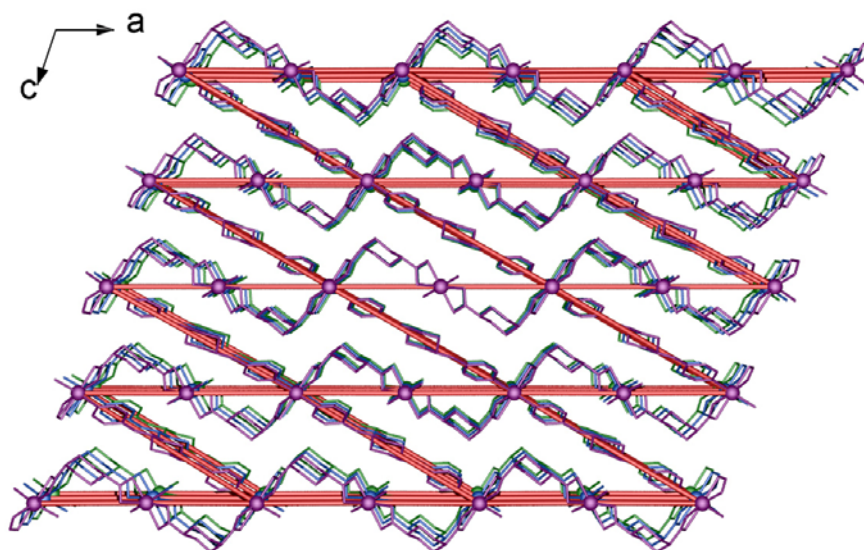

**Fig. S11.** The packing arrangement of compound **3** viewed along *b* axis.

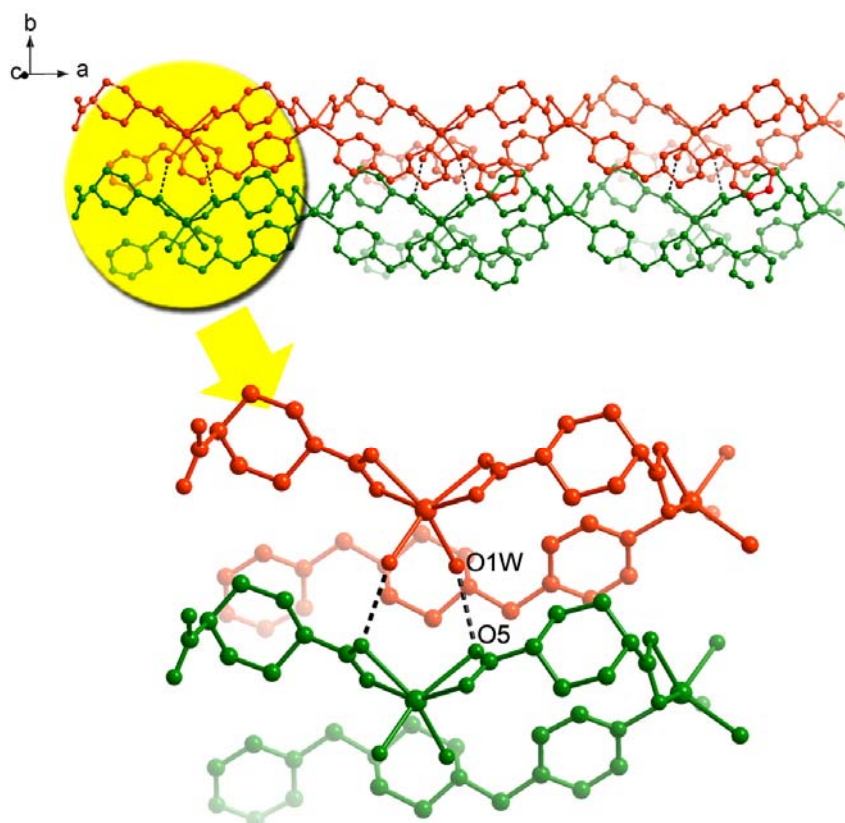

**Fig. S12.** The hydrogen bonding interactions between two adjacent layers in **3** with the close distance of O(1W)...O(5) 2.81 Å.

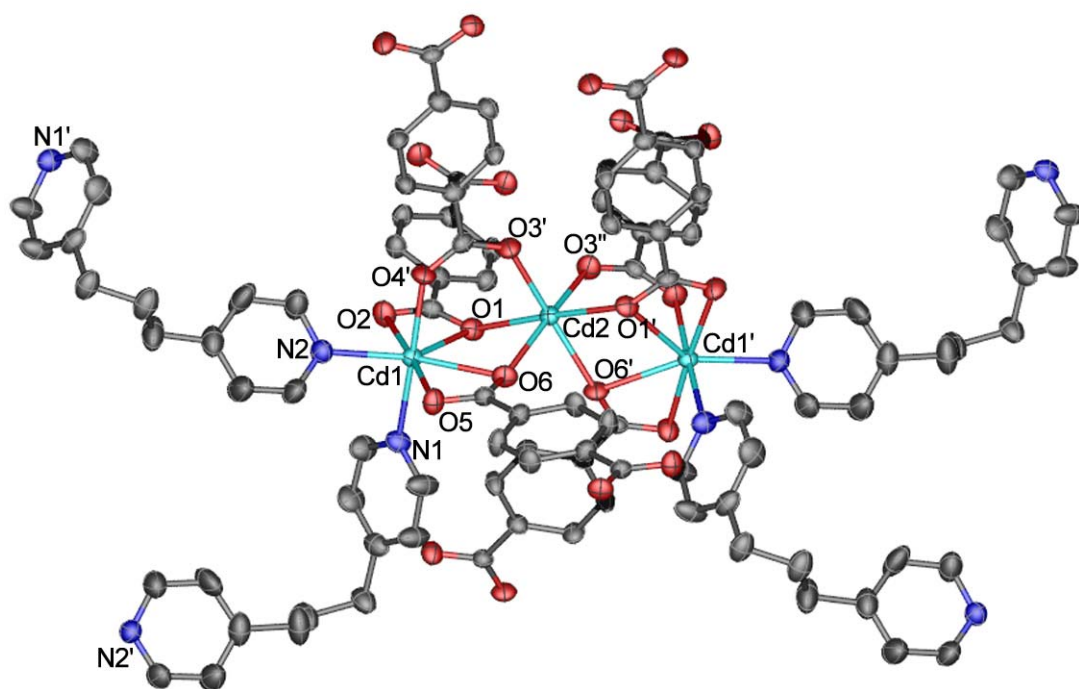

**Fig. S13** ORTEP view of the basic unit in compound **4** with thermal ellipsoids of 50%. H atoms are omitted for clarity. The symmetry transformations for O4' and O3' are  $x, -y+2, z-1/2$ , for O3'' are  $-x+1, -y+2, -z+1$ , and for O1' and O6' are  $-x+1, y, -z+1/2$ .

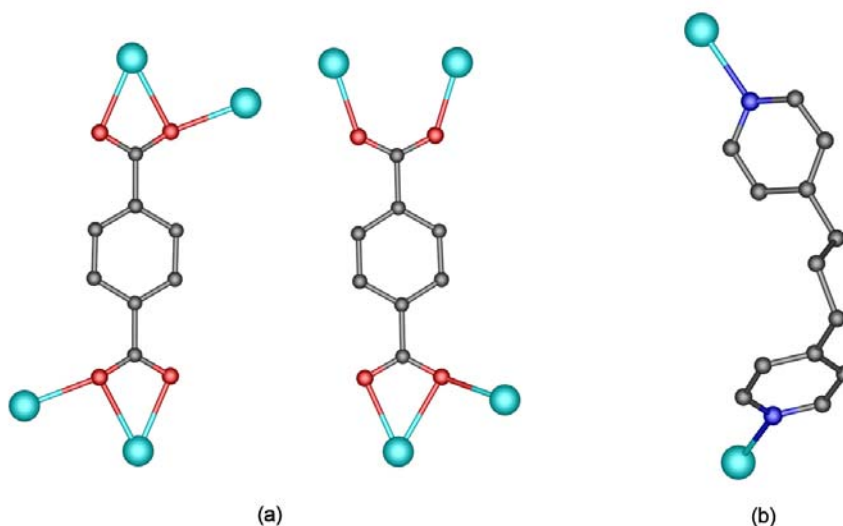

**Fig. S14** The coordination modes of organic linear ligands in compound **4**: (a) tp; (b) bpp.

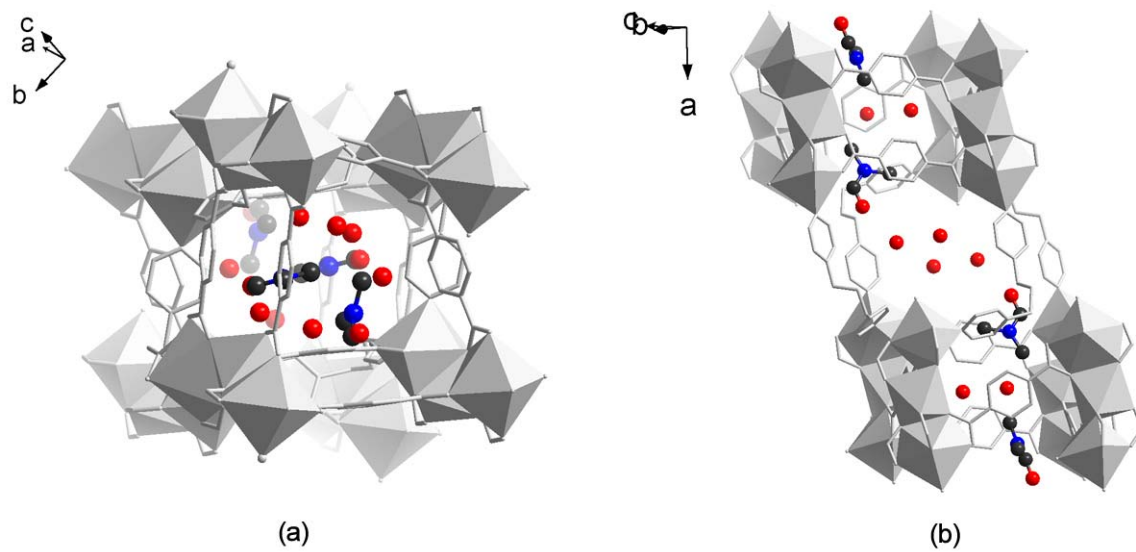

**Fig. S15.** The arrangement of “guest” solvent DMF and water molecules in one unit of the 3-D open framework of **4**: (a) top view and (b) side-view of the 3-D open framework unit.



## 2. Additional Tables of Selected bond lengths and angles as well as H-bonds

**Table S1** Selected bond lengths and angles of compounds **1 – 4**

---

|                   |           |                   |            |
|-------------------|-----------|-------------------|------------|
| <b>1</b>          |           |                   |            |
| Zn(1)-O(1)        | 1.950(2)  | O(1)-Zn(1)-N(1)   | 103.64(8)  |
| Zn(1)-O(4)A       | 1.956(2)  | O(4)A-Zn(1)-N(1)  | 114.59(9)  |
| Zn(1)-N(1)        | 2.047(2)  | O(1)-Zn(1)-N(2)   | 108.54(9)  |
| Zn(1)-N(2)        | 2.053(2)  | O(4)A-Zn(1)-N(2)  | 104.56(9)  |
| O(1)-Zn(1)-O(4)A  | 121.17(9) | N(1)-Zn(1)-N(2)   | 102.84(8)  |
| <b>2</b>          |           |                   |            |
| Zn(1)-O(3)A       | 1.920(6)  | O(3)B-Zn(1)-O(2)  | 106.3(2)   |
| Zn(1)-O(3)B       | 1.920(6)  | O(3)A-Zn(1)-N(1)  | 97.89(19)  |
| Zn(1)-O(2)        | 1.927(4)  | O(3)B-Zn(1)-N(1)  | 118.7(2)   |
| Zn(1)-N(1)        | 2.070(3)  | O(2)-Zn(1)-N(1)   | 113.14(10) |
| Zn(1)-N(1)C       | 2.070(3)  | O(3)A-Zn(1)-N(1)C | 118.7(2)   |
| O(3)-Zn(1)E       | 1.920(6)  | O(3)B-Zn(1)-N(1)C | 97.89(19)  |
| O(3)A-Zn(1)-O(3)B | 24.6(3)   | O(2)-Zn(1)-N(1)C  | 113.14(10) |
| O(3)A-Zn(1)-O(2)  | 106.3(2)  | N(1)-Zn(1)-N(1)C  | 106.84(17) |
| <b>3</b>          |           |                   |            |
| Cd(1)-O(1W)       | 2.246(2)  | O(1W)-Cd(1)-O(5)  | 95.05(8)   |
| Cd(1)-O(1W)A      | 2.246(2)  | O(1W)A-Cd(1)-O(5) | 154.01(7)  |
| Cd(1)-O(6)A       | 2.264(2)  | O(6)A-Cd(1)-O(5)  | 103.42(8)  |
| Cd(1)-O(6)        | 2.264(2)  | O(6)-Cd(1)-O(5)   | 56.28(7)   |
| Cd(1)-O(5)A       | 2.406(2)  | O(5)A-Cd(1)-O(5)  | 96.65(10)  |
| Cd(1)-O(5)        | 2.406(2)  | O(1)B-Cd(2)-O(1)  | 91.52(11)  |
| Cd(2)-O(1)B       | 2.290(2)  | O(1)B-Cd(2)-N(1)  | 97.87(8)   |
| Cd(2)-O(1)        | 2.290(2)  | O(1)-Cd(2)-N(1)   | 126.84(8)  |
| Cd(2)-N(1)        | 2.295(2)  | O(1)B-Cd(2)-N(1)B | 126.84(8)  |
| Cd(2)-N(1)B       | 2.295(2)  | O(1)-Cd(2)-N(1)B  | 97.87(8)   |
| Cd(2)-O(2)B       | 2.420(2)  | N(1)-Cd(2)-N(1)B  | 116.28(13) |

---

---

|                    |            |                   |            |
|--------------------|------------|-------------------|------------|
| Cd(2)-O(2)         | 2.420(2)   | O(1)B-Cd(2)-O(2)B | 55.45(7)   |
| O(1W)-Cd(1)-O(1W)A | 84.18(12)  | O(1)-Cd(2)-O(2)B  | 138.21(8)  |
| O(1W)-Cd(1)-O(6)A  | 98.40(8)   | N(1)-Cd(2)-O(2)B  | 86.28(8)   |
| O(1W)A-Cd(1)-O(6)A | 102.38(8)  | N(1)B-Cd(2)-O(2)B | 85.98(8)   |
| O(1W)-Cd(1)-O(6)   | 102.38(8)  | O(1)B-Cd(2)-O(2)  | 138.21(8)  |
| O(1W)A-Cd(1)-O(6)  | 98.40(8)   | O(1)-Cd(2)-O(2)   | 55.45(7)   |
| O(6)A-Cd(1)-O(6)   | 151.88(11) | N(1)-Cd(2)-O(2)   | 85.98(8)   |
| O(1W)-Cd(1)-O(5)A  | 154.01(7)  | N(1)B-Cd(2)-O(2)  | 86.28(8)   |
| O(6)A-Cd(1)-O(5)A  | 56.28(7)   | O(2)B-Cd(2)-O(2)  | 165.30(11) |
| O(6)-Cd(1)-O(5)A   | 103.42(8)  |                   |            |
| <b>4</b>           |            |                   |            |
| Cd(1)-O(4)A        | 2.258(4)   | O(4)A-Cd(1)-O(6)  | 85.09(14)  |
| Cd(1)-N(1)         | 2.328(5)   | N(1)-Cd(1)-O(6)   | 96.47(15)  |
| Cd(1)-N(2)         | 2.333(5)   | N(2)-Cd(1)-O(6)   | 143.41(15) |
| Cd(1)-O(5)         | 2.346(4)   | O(2)-Cd(1)-O(6)   | 129.73(13) |
| Cd(1)-O(2)         | 2.357(4)   | O(4)A-Cd(1)-O(1)  | 89.14(14)  |
| Cd(1)-O(6)         | 2.483(4)   | N(1)-Cd(1)-O(1)   | 90.68(15)  |
| Cd(1)-O(1)         | 2.507(4)   | N(2)-Cd(1)-O(1)   | 139.59(15) |
| Cd(2)-O(3)B        | 2.211(4)   | O(5)-Cd(1)-O(1)   | 129.76(12) |
| Cd(2)-O(3)A        | 2.211(4)   | O(6)-Cd(1)-O(1)   | 76.05(12)  |
| Cd(2)-O(6)C        | 2.306(4)   | O(3)B-Cd(2)-O(3)A | 97.9(2)    |
| Cd(2)-O(6)         | 2.306(4)   | O(3)B-Cd(2)-O(6)C | 89.40(15)  |
| Cd(2)-O(1)C        | 2.376(3)   | O(3)A-Cd(2)-O(6)C | 169.87(14) |
| Cd(2)-O(1)         | 2.376(3)   | O(3)B-Cd(2)-O(6)  | 169.87(14) |
| O(3)-Cd(2)B        | 2.211(4)   | O(3)A-Cd(2)-O(6)  | 89.40(15)  |
| O(4)-Cd(1)D        | 2.258(4)   | O(6)C-Cd(2)-O(6)  | 84.3(2)    |
| O(4)A-Cd(1)-N(1)   | 178.34(16) | O(3)B-Cd(2)-O(1)C | 91.14(14)  |
| O(4)A-Cd(1)-N(2)   | 87.25(16)  | O(3)A-Cd(2)-O(1)C | 90.72(14)  |
| N(1)-Cd(1)-N(2)    | 91.82(18)  | O(6)C-Cd(2)-O(1)C | 82.04(13)  |

---

|                  |            |                  |            |
|------------------|------------|------------------|------------|
| O(4)A-Cd(1)-O(5) | 92.32(15)  | O(6)-Cd(2)-O(1)C | 95.85(13)  |
| N(1)-Cd(1)-O(5)  | 89.06(15)  | O(3)B-Cd(2)-O(1) | 90.72(14)  |
| N(2)-Cd(1)-O(5)  | 90.61(15)  | O(3)A-Cd(2)-O(1) | 91.14(14)  |
| O(4)A-Cd(1)-O(2) | 88.44(15)  | O(6)C-Cd(2)-O(1) | 95.85(13)  |
| N(1)-Cd(1)-O(2)  | 90.12(15)  | O(6)-Cd(2)-O(1)  | 82.04(13)  |
| N(2)-Cd(1)-O(2)  | 85.64(16)  | O(1)C-Cd(2)-O(1) | 177.17(18) |
| O(5)-Cd(1)-O(2)  | 176.13(13) |                  |            |

*a* Symmetry codes: A -x+1,-y+1,-z+1 B x,y,z-1 C x,y,z+1 for **1**; A x,y,z-1 B x,-y+1/2,z-1 C x,-y+1/2,z D -x,-y,-z E x,y,z+1 for **2**; A -x+2,y,-z+1/2 B -x+1,y,-z+1/2 C -x,-y,-z for **3**; A x,-y+2,z-1/2 B -x+1,-y+2,-z+1 C -x+1,y,-z+1/2 D x,-y+2,z+1/2 E -x+1,-y+1,-z F -x+3/2,y-1/2,-z+1/2 G -x+3/2,y+1/2,-z+1/2 H -x+1,y,-z+3/2 for **4**

**Table S2** Hydrogen bonding interactions of {H<sub>2</sub>O}<sub>12</sub> cluster in compound **1**

| D-H      | d(D-H)<br>(Å) | d(H..A)<br>(Å) | <DHA<br>(°) | d(D..A)<br>(Å) | A   | Symmetry<br>Operation |
|----------|---------------|----------------|-------------|----------------|-----|-----------------------|
| O1W-H1AW | 0.852         | 2.477          | 115.91      | 2.950          | O2  | -x+1, -y+1, -z+1      |
| O1W-H1AW | 0.852         | 2.532          | 155.79      | 3.328          | O4W |                       |
| O1W-H1BW | 0.846         | 2.011          | 169.96      | 2.848          | O3W |                       |
| O2W-H2AW | 0.831         | 2.621          | 119.00      | 2.830          | O2W | -x+1, -y+2, -z        |
| O2W-H2BW | 0.834         | 2.006          | 170.79      | 2.832          | O5W | -x+1, -y+1, -z        |
| O3W-H3AW | 0.845         | 2.311          | 116.21      | 2.789          | O6W |                       |
| O3W-H3BW | 0.856         | 2.495          | 111.61      | 2.921          | O3  | -x+1, -y+1, -z+1      |
| O3W-H3BW | 0.856         | 2.618          | 160.44      | 3.437          | O5W |                       |
| O4W-H4AW | 0.853         | 2.115          | 176.96      | 2.967          | O2W |                       |
| O4W-H4BW | 0.852         | 2.038          | 170.80      | 2.882          | O2  | -x+1, -y+1, -z+1      |
| O5W-H5AW | 0.860         | 2.026          | 172.71      | 2.882          | O3  | -x+1, -y+1, -z+1      |
| O5W-H5BW | 0.853         | 2.238          | 165.25      | 3.070          | O6W |                       |
| O6W-H6AW | 0.837         | 2.207          | 146.51      | 2.942          | O5W | -x+1, -y+1, -z        |
| O6W-H6BW | 0.839         | 2.063          | 160.15      | 2.866          | O4W | -x+1, -y+1, -z        |

### 3. Physical Measurements

#### Infrared spectrum of 1-4

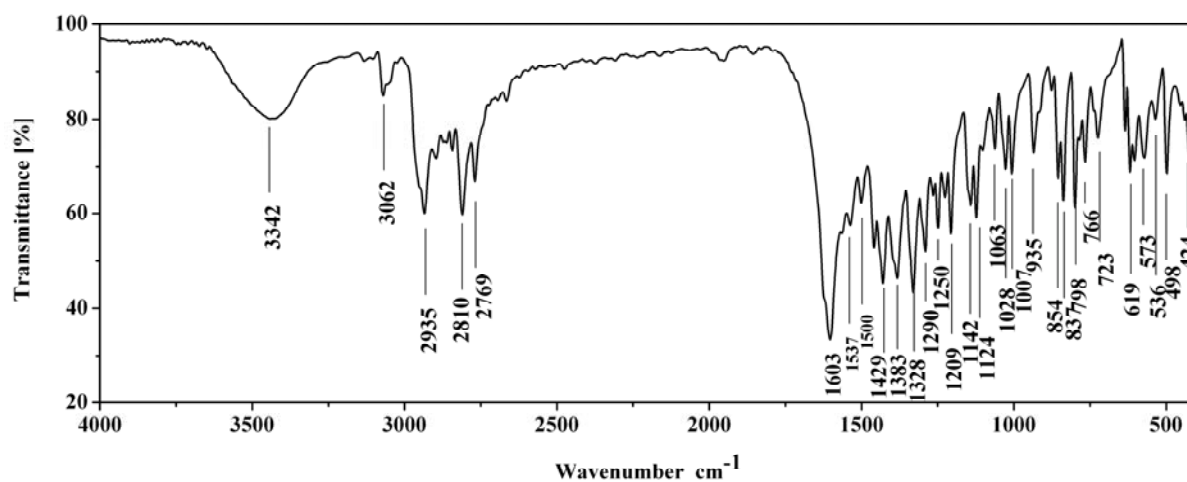

Fig. S16 IR spectra of 1

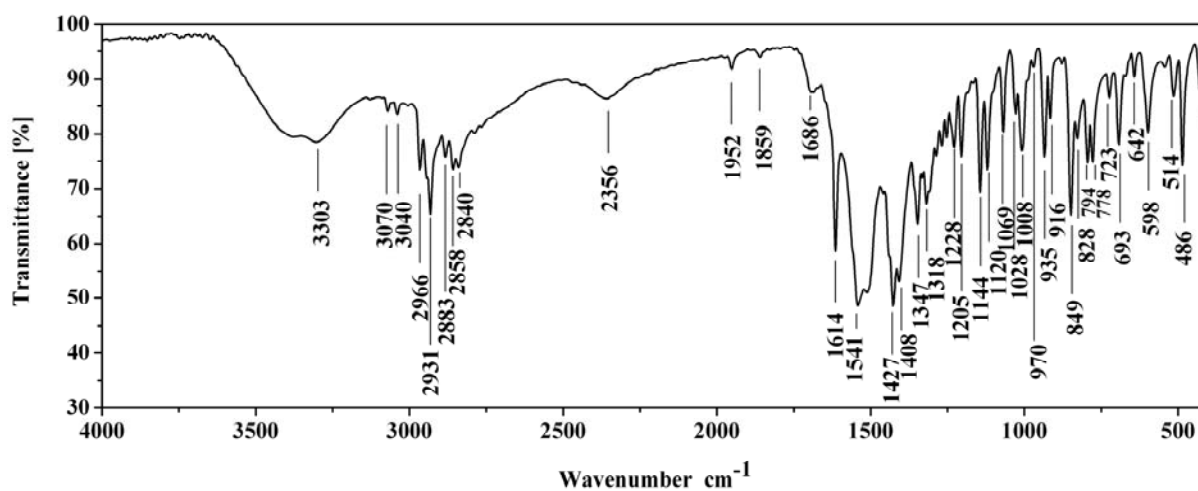

Fig. S17 IR spectra of 2

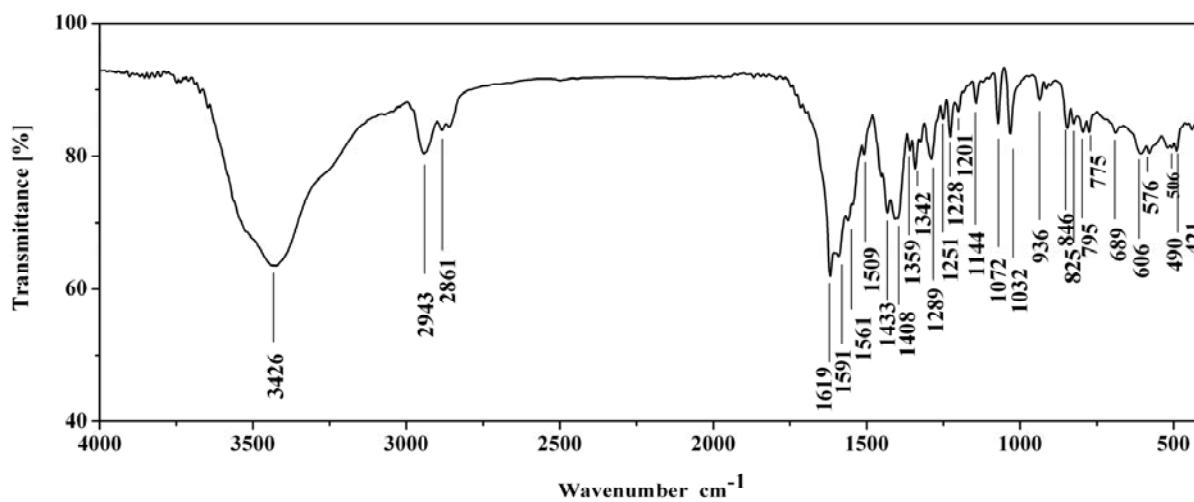

Fig. S18 IR spectra of 3

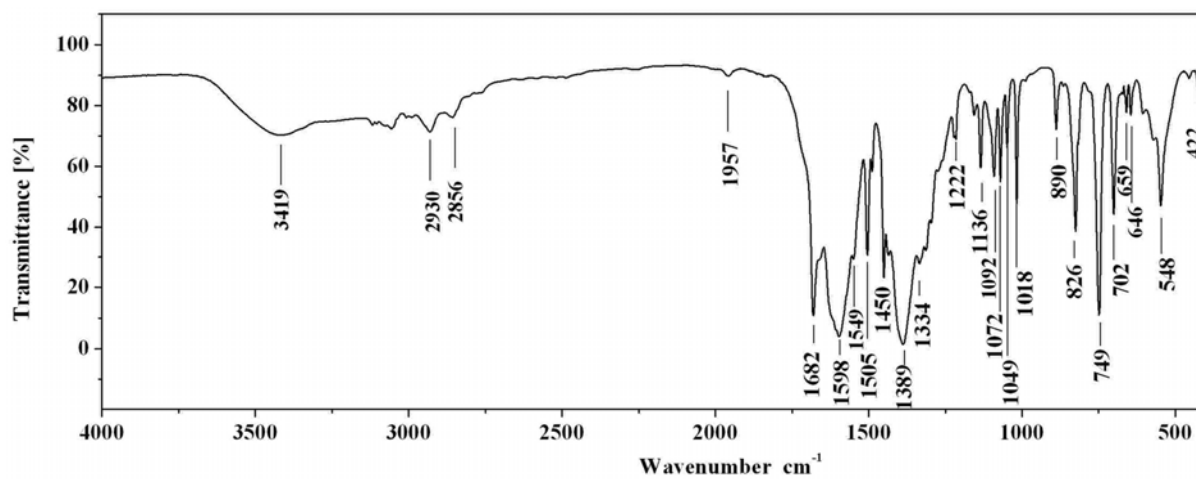

Fig. S19 IR spectra of 4

### Thermogravimetric (TG) analyses of 1–4

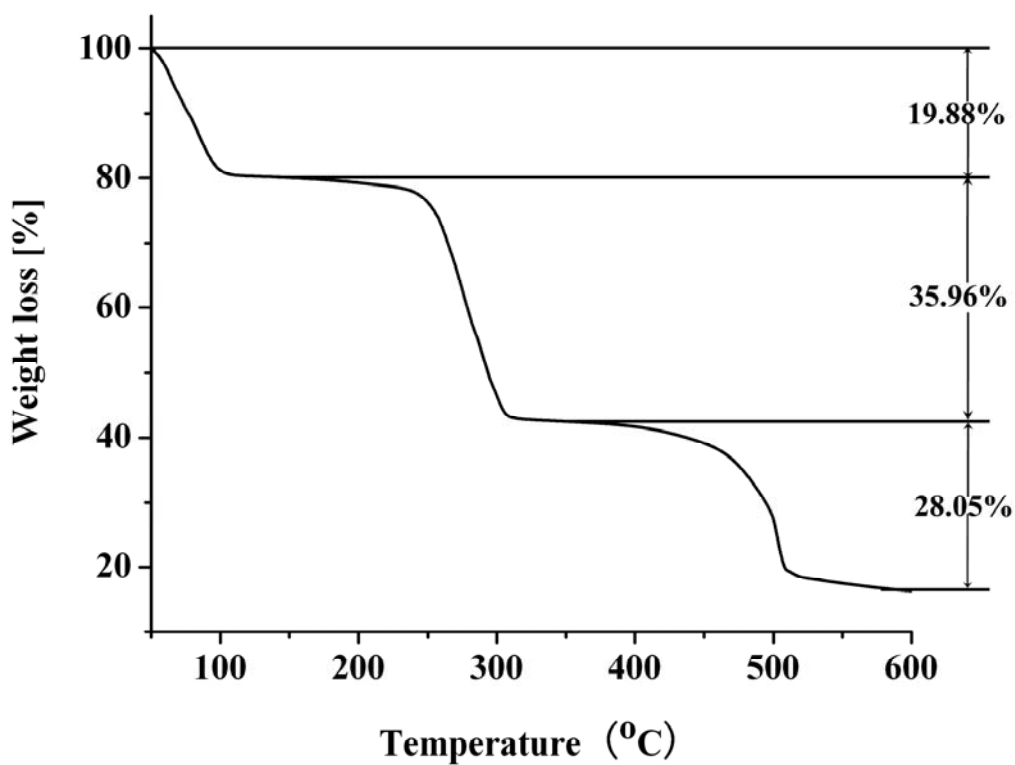

Fig. S20 TGA curve of 1

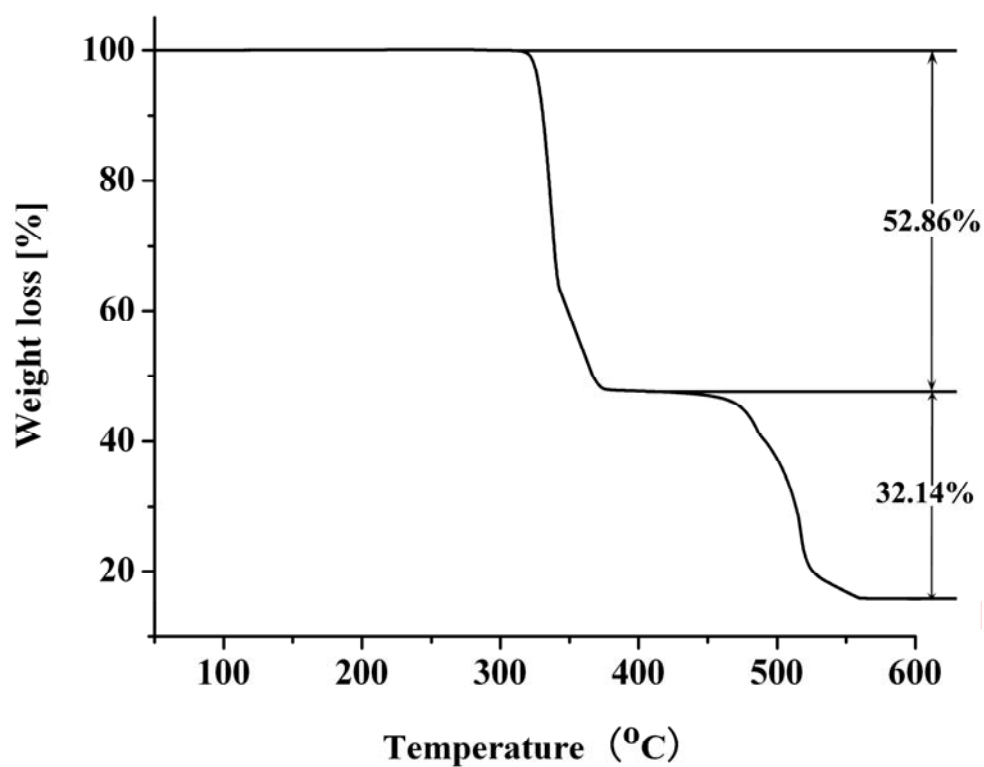

Fig. S21 TGA curve of 2

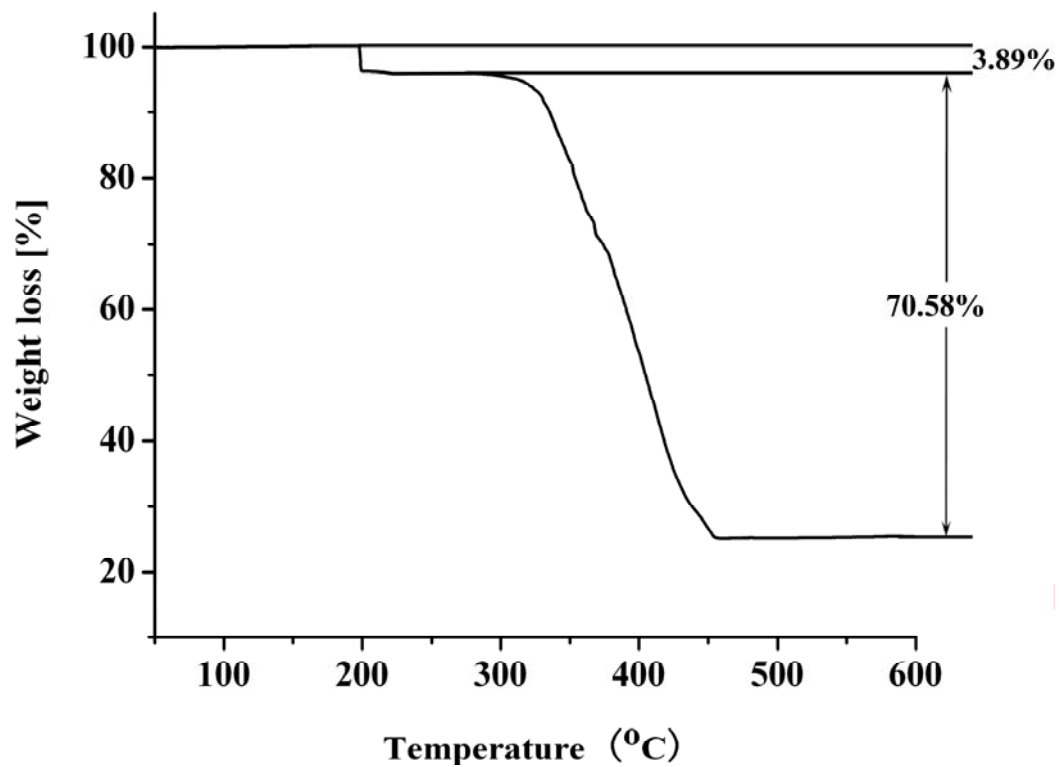

Fig. S22 TGA curve of 3

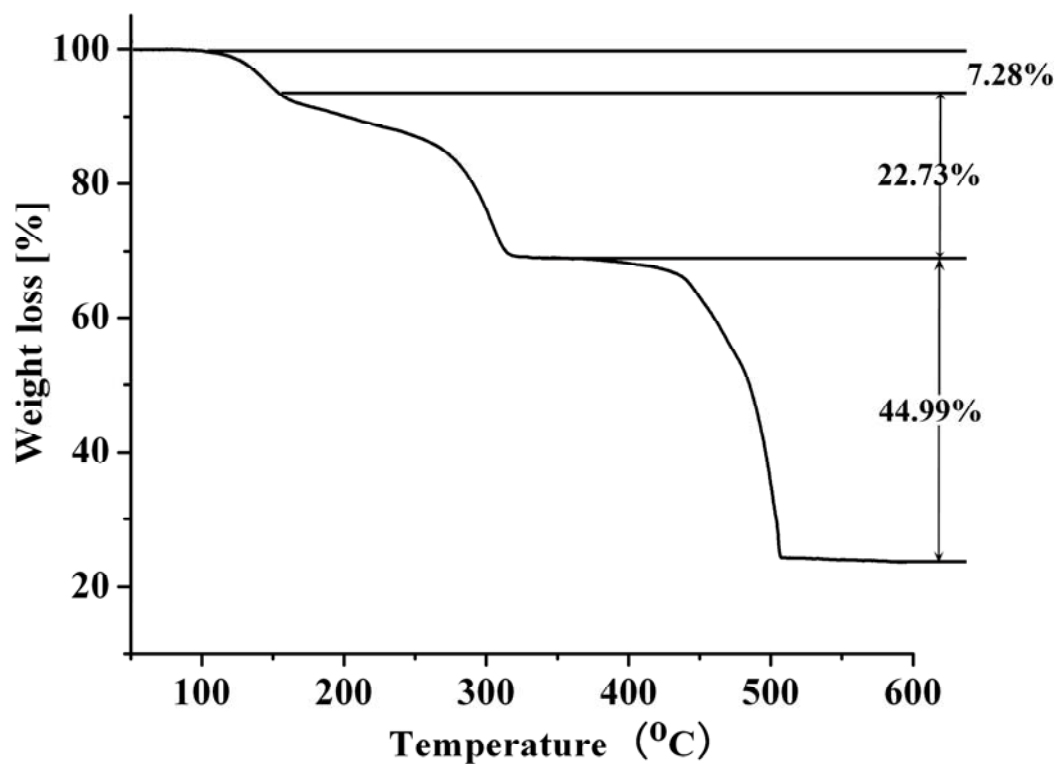

Fig. S23 TGA curve of 4

### Powder X-ray diffraction (PXRD) patterns of 1-4

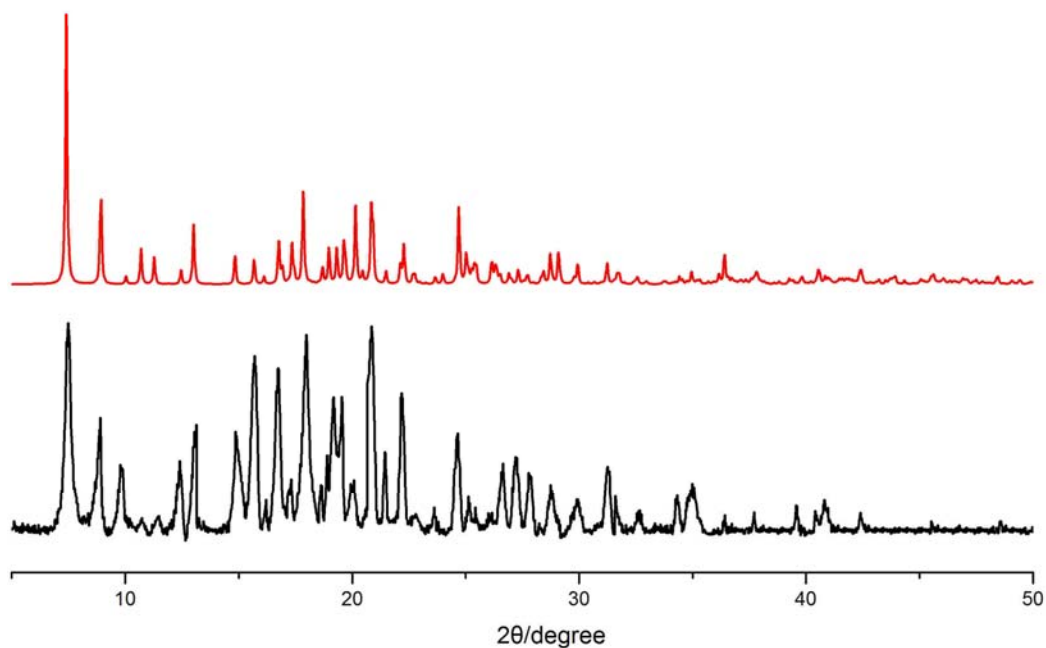

**Fig. S24** simulated and experimental patterns of **1**: simulated(red), as-synthesized sample at room temperature(black)

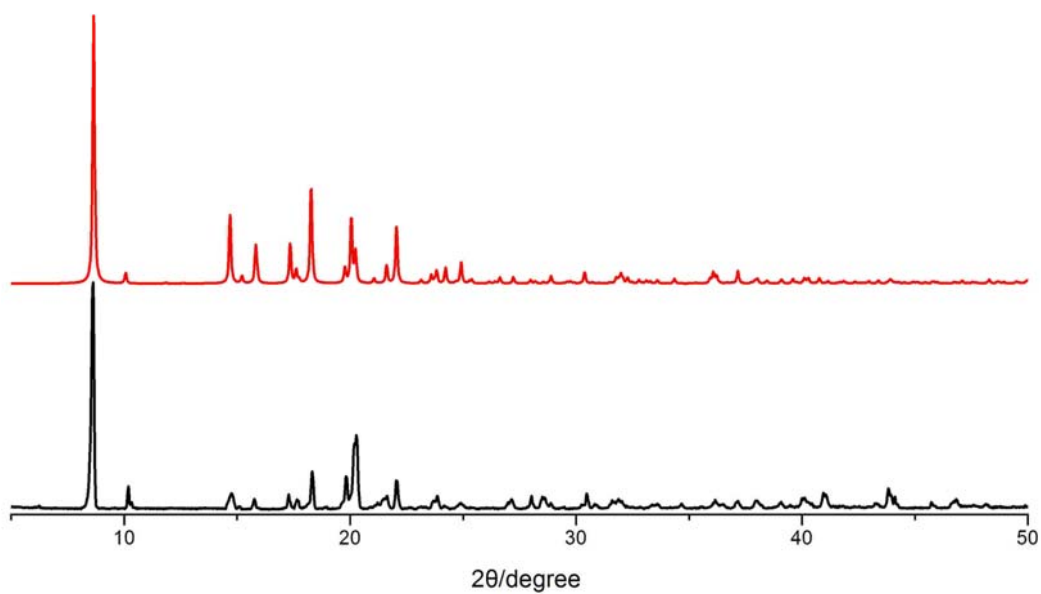

**Fig. S25** simulated and experimental patterns of **2**: simulated(red), as-synthesized sample at room temperature(black)



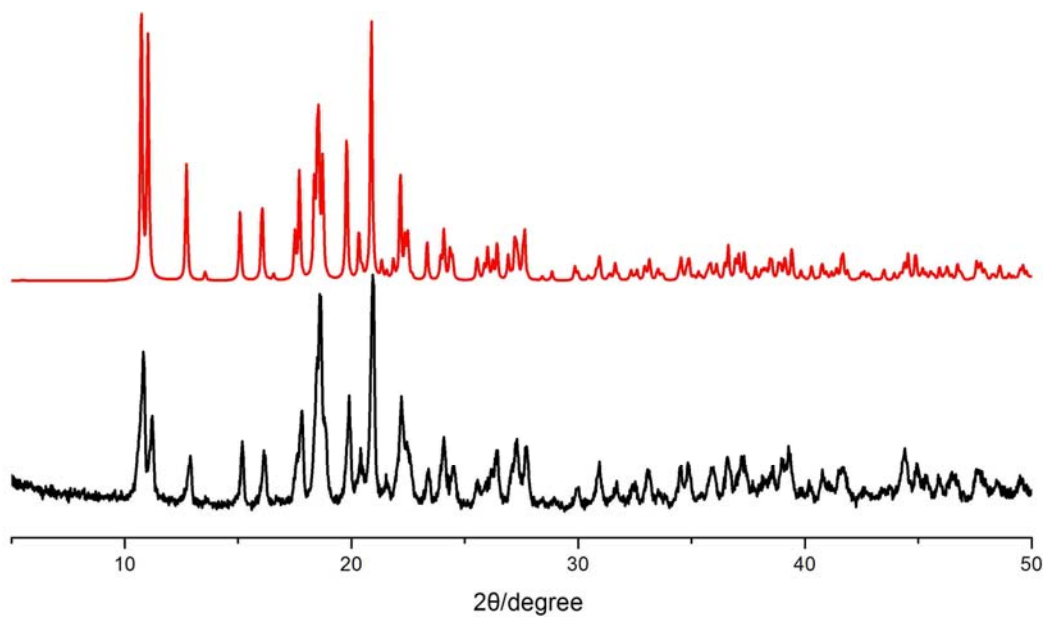

**Fig. S26** simulated and experimental patterns of **3**: simulated(red), as-synthesized sample at room temperature(black)

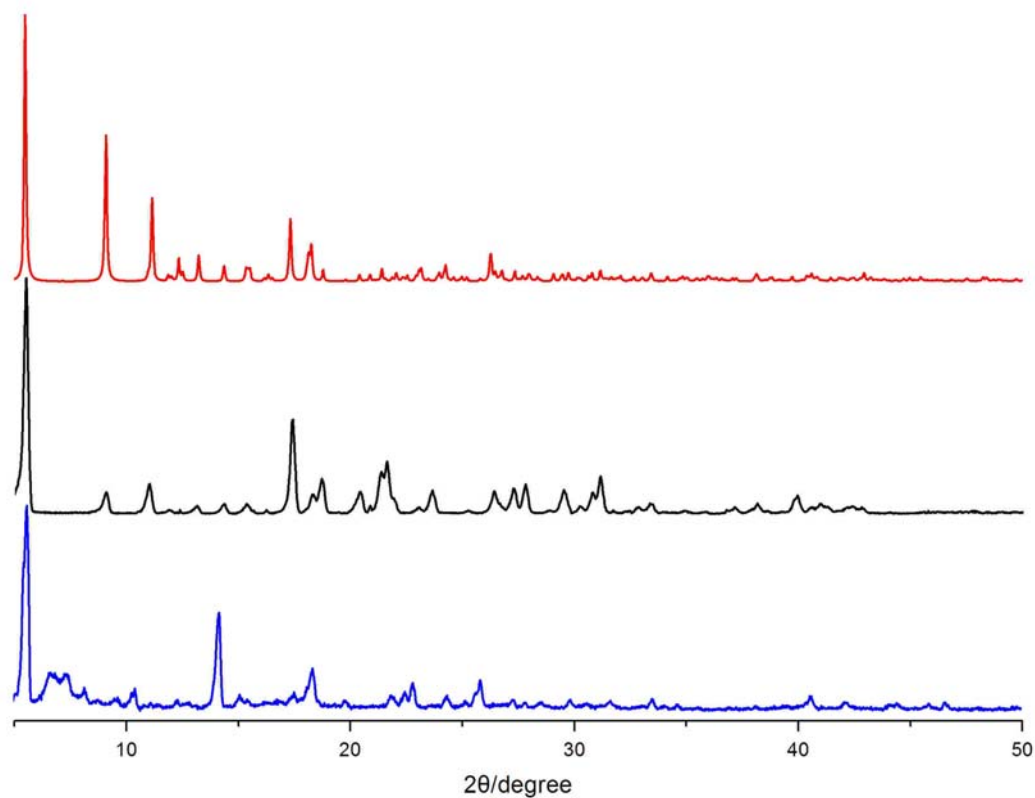

**Fig. S27** simulated and experimental patterns of **4**: simulated(red), as-synthesized sample at room temperature(black), desolvated sample(blue) of **4** (heated at 140°C for 12 h under vacuum).
